# Supplementary material for: Exploring influences on radiation protection compliance: a directed acyclic graph-based cross-sectional study in a non-teaching hospital in western China
Source: PeerJ. 2025 Oct 13;13:e20083. doi: 10.7717/peerj.20083 (PMC12530198; doi:10.7717/peerj.20083)
Supplement: Supplemental Information 1 [file peerj-13-20083-s001.xlsx]

## Sheet: Sheet1
Age	Age groups	Gender	Education level	Marital status	Working unit	Career in present unit (years)	Career in present unit (years)groups	Profession	Number of children	Radiation Training	Subjective health status	Daily exposure time (hours)	K1	K2	K3	K4	K5	K6	K7	K8	K9	K10	K11	K12	K13	K14	Total knowledge score	A1	A2	A3	A4	A5	Attitude score	B1	B2	B3	B4	B5	B6	B7	Behavior score	total points	centesimal system
26	＜30	Female	Bachelor	Unmarried	Endoscopic center	3	＜5	Nurse	None	No	Average	＜4	0	0	0	0	1	0	0	0	0	0	0	0	0	0	1	3	4	4	4	4	19	3	2	4	4	2	4	3	22	42	56.7568
26	＜30	Female	Bachelor	Unmarried	Endoscopic center	3	＜5	Nurse	None	No	Average	＜4	0	0	0	0	1	0	0	0	0	0	0	0	0	0	1	3	5	5	5	5	23	3	2	5	4	2	4	3	23	47	63.5135
34	30-40	Female	≥Master	Married	Radiology department	1	＜5	Technicians	1	No	Average	＜4	1	0	1	0	1	1	1	0	1	1	1	0	1	0	9	5	4	5	5	5	24	3	3	4	4	4	4	4	26	59	79.7297
37	30-40	Female	≥Master	Married	Surgery department	11	11-20years	Technicians	1	No	Average	＜4	0	0	1	0	1	1	1	0	0	1	1	0	0	0	6	4	3	5	5	5	22	3	3	5	5	5	5	5	31	59	79.7297
31	30-40	Female	≥Master	Married	Surgery department	9	5-10years	Nurse	1	No	Average	＜4	0	0	1	1	1	1	0	0	0	1	0	0	1	1	7	3	3	3	4	4	17	3	3	3	3	3	4	3	22	46	62.1622
34	30-40	Female	≥Master	Married	Radiology department	1	＜5	The other health personnel	1	No	Average	＜4	1	1	1	1	1	1	1	1	0	1	1	1	1	1	13	4	4	4	4	4	20	4	4	5	5	5	5	5	33	66	89.1892
37	30-40	Female	≥Master	Married	Surgery department	11	11-20years	The other health personnel	1	No	Average	＜4	0	0	1	0	1	1	1	0	0	1	1	0	0	0	6	5	3	5	5	5	23	3	3	5	5	5	5	5	31	60	81.0811
28	＜30	Female	≥Master	Unmarried	Oncology department	3	＜5	The other health personnel	None	Yes	Average	＜4	1	1	1	1	1	1	1	1	1	1	1	1	1	1	14	5	3	5	5	5	23	5	5	5	5	5	5	5	35	72	97.2973
28	＜30	Female	≥Master	Unmarried	Oncology department	3	＜5	The other health personnel	None	Yes	Average	＜4	1	1	1	1	1	1	1	1	1	1	1	1	1	1	14	5	5	5	5	5	25	5	5	5	5	5	5	5	35	74	100
25	＜30	Female	Bachelor	Unmarried	Radiology department	1	＜5	Doctor	None	No	Good	＜4	0	0	0	1	1	1	0	0	0	1	1	1	1	1	8	3	4	5	5	5	22	4	4		5	5	5	5	28	58	78.3784
23	＜30	Female	Bachelor	Unmarried	Department of interventional surgery	1	＜5	Doctor	None	No	Good	＜4	0	0	0	1	1	1	0	1	0	0	1	1	1	1	8	4	3	5	5	5	22	4	4	5	5	5	5	5	33	63	85.1351
23	＜30	Female	Bachelor	Unmarried	Department of interventional surgery	1	＜5	Doctor	None	No	Good	＜4	1	1	1	1	1	1	1	1	1	1	1	1	1	1	14	4	4	4	4	4	20	3	3	5	5	5	5	5	31	65	87.8378
23	＜30	Female	Bachelor	Unmarried	Department of interventional surgery	1	＜5	Doctor	None	No	Good	＜4	1	1	1	1	1	1	1	1	1	1	1	1	1	1	14	3	3	3	3	3	15	3	3	5	5	5	5	5	31	60	81.0811
23	＜30	Female	Bachelor	Unmarried	Department of interventional surgery	1	＜5	Doctor	None	No	Good	＜4	0	0	0	1	1	1	0	1	0	0	1	1	1	1	8	4	3	5	5	5	22	4	4	5	5	5	5	5	33	63	85.1351
24	＜30	Female	Bachelor	Unmarried	Department of interventional surgery	1	＜5	Doctor	None	No	Good	＜4	1	1	1	1	1	1	1	1	0	1	1	1	1	0	12	3	4	5	5	5	22	3	3	5	5	5	5	5	31	65	87.8378
23	＜30	Female	≥Master	Unmarried	Department of interventional surgery	1	＜5	Doctor	None	No	Good	＜4	1	1	1	1	1	1	1	1	0	1	1	1	1	1	13	4	3	5	5	5	22	4	4	5	5	5	5	5	33	68	91.8919
28	＜30	Female	≥Master	Unmarried	Surgery department	2	＜5	Doctor	None	No	Good	＜4	0	1	1	1	1	1	0	1	0	1	0	0	1	1	9	3	2	3	3	3	14	4	4	4	5	5	5	5	32	55	74.3243
28	＜30	Female	≥Master	Unmarried	Oncology department	2	＜5	Doctor	None	No	Good	＜4	0	1	1	1	1	1	0	1	0	1	0	0	1	1	9	3	2	5	5	5	20	4	4	4	5	5	5	5	32	61	82.4324
28	＜30	Female	≥Master	Unmarried	Oncology department	2	＜5	Doctor	None	No	Good	＜4	0	1	1	1	1	1	0	1	0	1	0	0	1	1	9	3	2	5	5	5	20	4	4	4	5	5	5	5	32	61	82.4324
60	＞50	Female	College and below	Married	Radiology department	30	＞20	The other health personnel	1	No	Good	＜4	0	0	0	0	0	0	1	0	0	1	0	0	0	0	2	3	3	3	3	3	15	1	1	1	1	1	1	1	7	24	32.4324
25	＜30	Female	Bachelor	Unmarried	Radiology department	1	＜5	Doctor	None	Yes	Good	＜4	1	1	1	1	1	1	1	1	0	1	1	1	1	1	13	5	5	5	5	5	25	5	5	5	5	5	5	5	35	73	98.6486
25	＜30	Female	≥Master	Unmarried	Radiology department	1	＜5	Doctor	None	Yes	Good	＜4	1	1	1	1	1	1	1	1	1	1	1	1	1	1	14	5	5	5	5	5	25	5	5	5	5	5	5	5	35	74	100
25	＜30	Female	≥Master	Unmarried	Radiology department	1	＜5	Doctor	None	Yes	Good	＜4	1	1	1	1	1	1	1	1	0	1	1	1	1	1	13	5	5	5	5	5	25	5	5	5	5	5	5	5	35	73	98.6486
26	＜30	Female	≥Master	Unmarried	Surgery department	1	＜5	Doctor	None	Yes	Good	＜4	1	0	1	1	0	0	0	0	0	1	0	0	0	0	4	4	4	4	4	4	20	1	1	1	4	4	4	4	19	43	58.1081
26	＜30	Female	≥Master	Unmarried	Oncology department	1	＜5	Doctor	None	Yes	Good	＜4	1	0	1	1	0	0	0	0	0	1	0	0	0	0	3	4	4	4	4	4	20	1	1	1	4	4	4	4	19	42	56.7568
26	＜30	Female	≥Master	Unmarried	Oncology department	1	＜5	Doctor	None	Yes	Good	＜4	1	0	1	1	0	0	0	0	0	1	0	0	0	0	4	4	4	4	4	4	20	1	1	1	4	4	4	4	19	43	58.1081
26	＜30	Female	≥Master	Unmarried	Surgery department	2	＜5	Doctor	None	Yes	Good	＜4	1	0	1	1	0	0	0	0	0	1	0	0	0	0	4	4	4	4	4	4	20	1	1	1	4	4	4	4	19	43	58.1081
28	＜30	Female	Bachelor	Unmarried	Oncology department	5	5-10years	Technicians	None	Yes	Good	＜4	1	1	1	1	1	1	1	1	1	1	1	1	1	1	14	4	3	5	4	4	20	5	4	3	4	5	5	5	31	65	87.8378
28	＜30	Female	Bachelor	Unmarried	Oncology department	5	5-10years	Technicians	None	Yes	Good	＜4	1	1	1	1	1	1	1	1	1	1	1	1	1	1	14	4	3	5	4	4	20	5	4	3	4	5	5	5	31	65	87.8378
31	30-40	Female	≥Master	Married	Nuclear medicine department	2	＜5	Doctor	1	Yes	Good	＜4	1	1	1	0	1	1	0	1	1	1	1	1	1	1	12	4	3	5	4	5	21	4	2	5	4	5	5	5	30	63	85.1351
31	30-40	Female	≥Master	Married	Nuclear medicine department	2	＜5	Doctor	1	Yes	Good	＜4	1	1	1	0	1	1	0	1	1	1	1	1	1	1	12	4	3	5	4	5	21	5	2	5	4	5	5	5	31	64	86.4865
35	30-40	Female	Bachelor	Married	Radiology department	8	5-10years	Doctor	≥2	Yes	Good	＜4	1	1	1	1	1	1	1	1	1	1	1	1	1	1	14	4	4	4	4	4	20	5	4	5	5	5	5	5	34	68	91.8919
35	30-40	Female	Bachelor	Married	Radiology department	8	5-10years	Doctor	≥2	Yes	Good	＜4	1	1	1	1	1	1	1	1	0	1	1	1	1	1	13	4	4	4	4	4	20	5	4	5	5	5	5	5	34	67	90.5405
33	30-40	Female	≥Master	Married	Oncology department	6	5-10years	Doctor	1	No	Good	＜4	1	1	1	1	1	1	1	1	0	1	1	0	1	1	12	4	4	5	5	5	23	5	4	4	5	4	4	4	30	65	87.8378
33	30-40	Female	≥Master	Married	Oncology department	6	5-10years	Doctor	1	No	Good	＜4	1	1	1	1	1	1	1	1	1	1	1	0	1	1	13	4	4	5	5	5	23	5	4	4	5	4	4	4	30	66	89.1892
30	30-40	Female	Bachelor	Married	Nuclear medicine department	5	5-10years	Doctor	None	Yes	Good	＜4	1	1	1	0	1	1	1	1	1	1	1	1	1	1	13	5	4	4	5	5	23	5	5	5	5	5	5	5	35	71	95.9459
30	30-40	Female	Bachelor	Married	Surgery department	5	5-10years	Doctor	None	Yes	Good	＜4	1	1	1	0	1	1	1	1	1	1	1	1	1	1	13	5	4	4	5	5	23	4	3	5	5	5	5	5	32	68	91.8919
48	41-50	Female	Bachelor	Married	Nuclear medicine department	22	＞20	Doctor	≥2	Yes	Good	＜4	1	1	1	1	1	1	1	1	1	1	1	1	1	1	14	5	2	4	4	5	20	5	4	4	4	5	5	5	32	66	89.1892
48	41-50	Female	Bachelor	Married	Nuclear medicine department	23	＞20	Doctor	≥2	Yes	Good	＜4	1	1	1	1	1	1	1	1	0	1	1	1	1	1	13	5	3	4	4	5	21	5	4	4	4	5	5	5	32	66	89.1892
27	＜30	Female	≥Master	Unmarried	Surgery department	2	＜5	The other health personnel	None	No	Average	＜4	1	0	1	1	1	1	1	1	1	1	1	1	1	1	13	3	3	3	3	3	15	5	5	5	5	5	5	5	35	63	85.1351
27	＜30	Female	≥Master	Unmarried	Surgery department	2	＜5	The other health personnel	None	No	Average	＜4	1	1	1	1	1	1	1	1	1	1	1	1	1	1	14	3	3	3	3	3	15	5	5	5	5	5	5	5	35	64	86.4865
27	＜30	Female	≥Master	Unmarried	Surgery department	2	＜5	The other health personnel	None	No	Average	＜4	1	1	1	1	1	1	1	1	1	1	1	1	1	1	14	3	3	3	3	3	15	5	5	5	5	5	5	5	35	64	86.4865
27	＜30	Female	≥Master	Unmarried	Oncology department	2	＜5	The other health personnel	None	No	Average	＜4	1	1	1	1	1	1	1	1	0	1	1	1	1	1	13	3	3	3	3	3	15	5	5	5	5	5	5	5	35	63	85.1351
30	30-40	Female	Bachelor	Married	Surgery department	5	5-10years	Nurse	1	No	Average	＜4	1	0	0	0	1	1	1	0	0	1	1	0	0	0	6	3	4	5	5	4	21	3	2	5	5	3	5	5	28	55	74.3243
30	30-40	Female	Bachelor	Married	Surgery department	5	5-10years	Nurse	1	No	Average	＜4	1	0	0	0	1	1	1	0	0	1	1	0	0	0	6	3	4	5	5	4	21	3	2	5	5	3	5	5	28	55	74.3243
30	30-40	Female	Bachelor	Married	Endoscopic center	7	5-10years	Nurse	1	No	Average	＜4	1	0	0	0	1	1	1	0	0	1	1	0	0	0	6	3	4	5	5	4	21	4	2	5	5	3	5	5	29	56	75.6757
30	30-40	Female	Bachelor	Married	Endoscopic center	7	5-10years	Nurse	1	No	Average	＜4	1	0	0	0	1	1	1	0	0	1	1	0	0	0	6	3	4	5	5	4	21	4	2	5	5	3	5	5	29	56	75.6757
33	30-40	Female	Bachelor	Married	Surgery department	7	5-10years	Nurse	1	No	Average	＜4	1	0	0	0	1	1	1	0	0	1	1	0	0	0	6	3	4	5	5	4	21	3	2	5	5	3	5	5	28	55	74.3243
33	30-40	Female	Bachelor	Married	Surgery department	7	5-10years	Nurse	1	No	Average	＜4	1	0	0	0	1	1	1	0	0	1	1	0	0	0	6	3	4	5	5	4	21	3	2	5	5	3	5	5	28	55	74.3243
35	30-40	Female	≥Master	Married	Surgery department	6	5-10years	Doctor	≥2	No	Average	＜4	0	0	1	0	1	1	0	1	0	0	0	0	0	0	4	3	4	5	5	5	22	3	3	5	5	4	5	5	30	56	75.6757
35	30-40	Female	≥Master	Married	Surgery department	6	5-10years	Doctor	≥2	No	Average	＜4	0	0	1	0	1	1	0	1	0	0	0	0	0	0	4	3	4	5	5	5	22	3	3	5	5	4	5	5	30	56	75.6757
35	30-40	Female	≥Master	Married	Endoscopic center	7	5-10years	Doctor	≥2	No	Average	＜4	0	0	1	0	1	1	0	1	0	0	0	0	0	0	4	3	4	5	5	5	22	4	3	5	5	4	5	5	31	57	77.027
35	30-40	Female	≥Master	Married	Endoscopic center	7	5-10years	Doctor	≥2	No	Average	＜4	0	0	1	0	1	1	0	1	0	0	0	0	0	0	4	3	4	5	5	5	22	4	3	5	5	4	5	5	31	57	77.027
35	30-40	Female	≥Master	Married	Surgery department	7	5-10years	Doctor	≥2	No	Average	＜4	0	0	1	0	1	1	0	1	0	0	0	0	0	0	4	3	4	5	5	5	22	3	3	5	5	4	5	5	30	56	75.6757
35	30-40	Female	≥Master	Married	Surgery department	7	5-10years	Doctor	≥2	No	Average	＜4	0	0	1	0	1	1	0	1	0	0	0	0	0	0	4	3	4	4	4	4	19	3	3	4	3	3	3	3	22	45	60.8108
33	30-40	Female	≥Master	Married	Radiology department	8	5-10years	Doctor	1	Yes	Average	＜4	0	0	1	1	1	1	1	1	1	1	1	1	1	1	12	5	5	5	5	5	25	5	5	5	5	5	5	5	35	72	97.2973
33	30-40	Female	≥Master	Married	Radiology department	8	5-10years	Doctor	1	Yes	Average	＜4	0	0	1	1	1	1	1	1	1	1	1	1	1	1	12	5	5	5	5	5	25	5	5	5	5	5	5	5	35	72	97.2973
33	30-40	Female	Bachelor	Married	Radiology department	8	5-10years	Technicians	1	Yes	Average	＜4	0	0	1	1	1	1	1	1	1	1	1	1	1	1	12	5	5	5	5	5	25	5	5	5	5	5	5	5	35	72	97.2973
33	30-40	Female	Bachelor	Married	Radiology department	8	5-10years	Technicians	1	Yes	Average	＜4	0	0	1	1	1	1	1	1	1	1	1	1	1	1	12	5	5	5	5	5	25	5	5	5	5	5	5	5	35	72	97.2973
50	41-50	Female	≥Master	Married	Nuclear medicine department	26	＞20	Doctor	1	No	Good	＜4	1	1	1	1	1	1	1	1	1	1	1	1	1	1	14	3	2	4	4	4	17	2	1	3	2	4	5	5	22	53	71.6216
50	41-50	Female	≥Master	Married	Surgery department	26	＞20	Doctor	1	No	Good	＜4	1	1	1	1	1	1	1	1	1	1	1	1	1	1	14	4	2	4	4	4	18	2	1	3	2	4	5	5	22	54	72.973
35	30-40	Female	Bachelor	Married	Nuclear medicine department	12	11-20years	Technicians	1	No	Good	＜4	1	1	1	1	1	1	1	1	1	1	1	1	1	1	14	4	5	5	5	5	24	5	5	5	5	5	5	5	35	73	98.6486
42	41-50	Female	≥Master	Married	Nuclear medicine department	12	11-20years	Technicians	1	No	Good	＜4	1	1	1	1	1	1	1	1	1	1	1	1	1	1	14	4	5	5	5	5	24	5	5	5	5	5	5	5	35	73	98.6486
26	＜30	Female	Bachelor	Married	Surgery department	4	＜5	Nurse	None	No	Good	＜4	0	0	0	0	1	1	1	0	0	0	1	0	0	0	4	3	4	4	4	4	19	3	2	4	3	3	3	4	22	45	60.8108
26	＜30	Female	Bachelor	Married	Surgery department	4	＜5	Nurse	None	No	Good	＜4	0	0	0	0	1	1	1	0	0	0	1	0	0	0	4	3	4	4	4	4	19	3	2	4	3	3	3	4	22	45	60.8108
26	＜30	Female	Bachelor	Married	Surgery department	4	＜5	Nurse	None	No	Good	＜4	0	0	0	0	1	1	1	0	0	0	1	0	0	0	4	3	4	4	4	4	19	3	4	4	3	3	3	4	24	47	63.5135
28	＜30	Female	Bachelor	Married	Surgery department	4	＜5	Nurse	None	No	Good	＜4	0	0	0	0	1	1	1	0	0	0	1	0	0	0	4	3	4	4	4	4	19	3	2	4	3	3	3	4	22	45	60.8108
29	＜30	Female	Bachelor	Married	Surgery department	4	＜5	Nurse	None	No	Good	＜4	0	0	0	0	1	1	1	0	0	0	1	0	0	0	4	3	4	4	4	4	19	3	2	4	3	3	3	4	22	45	60.8108
26	＜30	Female	Bachelor	Married	Oncology department	4	＜5	Nurse	None	No	Good	＜4	0	0	0	0	1	1	1	0	0	0	1	0	0	0	4	3	4	4	4	4	19	3	4	4	3	3	3	4	24	47	63.5135
22	＜30	Female	Bachelor	Unmarried	Nuclear medicine department	1	＜5	Technicians	None	Yes	Good	＜4	1	1	1	1	1	1	0	1	1	1	1	1	1	0	12	4	3	5	5	5	22	5	5	5	5	5	5	5	35	69	93.2432
22	＜30	Female	≥Master	Unmarried	Nuclear medicine department	1	＜5	Technicians	None	Yes	Good	＜4	1	1	1	1	1	1	0	1	1	1	1	1	1	0	12	4	3	5	5	5	22	5	5	5	5	5	5	5	35	69	93.2432
31	30-40	Female	≥Master	Married	Nuclear medicine department	12	11-20years	Technicians	None	No	Average	4-8hours	1	1	1	1	1	1	1	1	1	1	1	1	1	1	14	3	4	4	4	4	19	5	5	5	5	5	5	5	35	68	91.8919
45	41-50	Female	≥Master	Married	Nuclear medicine department	22	＞20	Technicians	None	No	Average	4-8hours	1	1	1	1	1	1	1	1	1	1	1	1	1	1	14	3	5	5	5	5	23	5	5	5	5	5	5	5	35	72	97.2973
38	30-40	Female	≥Master	Unmarried	Radiology department	12	11-20years	Doctor	None	Yes	Average	4-8hours	1	1	1	0	1	1	1	1	1	1	1	1	1	1	13	3	5	5	5	5	23	4	3	5	5	5	5	5	32	68	91.8919
38	30-40	Female	≥Master	Unmarried	Radiology department	12	11-20years	Doctor	None	Yes	Average	4-8hours	1	1	1	0	1	1	1	1	1	1	1	1	1	1	13	5	5	5	5	5	25	5	5	5	5	5	5	5	35	73	98.6486
31	30-40	Female	≥Master	Married	Oncology department	10	5-10years	Technicians	1	Yes	Average	4-8hours	0	1	1	1	1	1	1	1	1	1	0	1	1	1	12	5	4	4	5	5	23	5	5	5	5	5	5	5	35	70	94.5946
31	30-40	Female	≥Master	Married	Oncology department	10	5-10years	Technicians	1	Yes	Average	4-8hours	0	1	1	1	1	1	1	1	1	1	0	1	1	1	12	5	4	4	5	5	23	5	5	5	5	5	5	5	35	70	94.5946
40	30-40	Female	≥Master	Married	Surgery department	16	11-20years	The other health personnel	≥2	Yes	Average	4-8hours	1	1	1	1	1	1	1	0	0	1	1	0	0	0	9	4	3	5	5	5	22	3	3	5	5	5	5	5	31	62	83.7838
40	30-40	Female	≥Master	Married	Oncology department	18	11-20years	The other health personnel	≥2	Yes	Average	4-8hours	1	1	1	1	1	1	1	0	0	1	1	0	0	1	10	4	4	5	5	5	23	4	4	5	5	5	5	5	33	66	89.1892
20	＜30	Female	Bachelor	Unmarried	Radiology department	1	＜5	Technicians	None	No	Good	4-8hours	1	1	1	1	1	1	1	1	1	1	0	0	0	0	10	4	5	5	5	5	24	5	4	5	5	3	3	4	29	63	85.1351
20	＜30	Female	Bachelor	Unmarried	Radiology department	1	＜5	Technicians	None	No	Good	4-8hours	1	1	1	1	1	1	1	1	1	1	0	0	0	0	10	4	5	5	5	5	24	5	4	5	5	3	3	4	29	63	85.1351
21	＜30	Female	Bachelor	Unmarried	Radiology department	1	＜5	Technicians	None	No	Good	4-8hours	1	1	1	1	1	1	1	1	1	1	0	0	0	0	10	4	5	5	5	5	24	5	4	5	5	3	3	4	29	63	85.1351
21	＜30	Female	Bachelor	Unmarried	Radiology department	1	＜5	Technicians	None	No	Good	4-8hours	1	1	1	1	1	1	1	1	1	1	0	0	0	0	10	4	5	5	5	5	24	5	4	5	5	3	3	4	29	63	85.1351
21	＜30	Female	Bachelor	Unmarried	Radiology department	1	＜5	Technicians	None	No	Good	4-8hours	1	1	1	1	1	1	1	1	1	1	0	0	0	0	10	4	5	5	5	5	24	5	4	5	5	3	3	4	29	63	85.1351
21	＜30	Female	Bachelor	Unmarried	Radiology department	1	＜5	Technicians	None	No	Good	4-8hours	1	1	1	1	1	1	1	1	1	1	0	0	0	0	10	4	5	5	5	5	24	5	4	5	5	3	3	4	29	63	85.1351
21	＜30	Female	Bachelor	Unmarried	Radiology department	1	＜5	Technicians	None	No	Good	4-8hours	1	1	1	1	1	1	1	1	1	1	0	0	0	0	10	4	5	5	5	5	24	5	4	5	5	3	3	4	29	63	85.1351
21	＜30	Female	Bachelor	Unmarried	Radiology department	1	＜5	Technicians	None	No	Good	4-8hours	1	1	1	1	1	1	1	1	1	1	0	0	0	0	10	4	5	5	5	5	24	5	4	5	5	3	3	4	29	63	85.1351
30	30-40	Female	Bachelor	Unmarried	Department of interventional surgery	2	＜5	Doctor	None	Yes	Good	4-8hours	0	0	1	1	1	1	1	1	1	1	1	1	1	1	12	2	3	4	4	4	17	5	3	5	5	5	5	5	33	62	83.7838
30	30-40	Female	≥Master	Unmarried	Department of interventional surgery	2	＜5	Technicians	None	Yes	Good	4-8hours	1	1	1	1	1	1	1	1	1	1	1	1	1	1	14	5	5	5	5	5	25	5	4	5	5	5	5	5	34	73	98.6486
43	41-50	Female	Bachelor	Married	Oncology department	20	11-20years	Technicians	None	Yes	Good	4-8hours	1	1	1	1	1	1	1	1	0	0	1	1	1	1	12	5	5	5	5	5	25	5	5	5	5	5	5	5	35	72	97.2973
43	41-50	Female	Bachelor	Married	Oncology department	20	11-20years	Technicians	None	Yes	Good	4-8hours	1	1	1	1	1	1	1	1	1	1	1	1	1	1	14	5	5	5	5	5	25	5	5	5	5	5	5	5	35	74	100
30	30-40	Female	Bachelor	Unmarried	Department of interventional surgery	2	＜5	Nurse	None	Yes	Good	4-8hours	0	0	0	0	0	1	1	1	1	1	1	1	1	1	9	3	4	4	4	4	19	4	4	4	5	5	5	5	32	60	81.0811
30	30-40	Female	Bachelor	Unmarried	Department of interventional surgery	2	＜5	Nurse	None	Yes	Good	4-8hours	0	0	0	1	1	1	1	1	1	1	1	1	1	1	11	3	4	5	5	5	22	5	3	5	5	5	5	5	33	66	89.1892
30	30-40	Female	Bachelor	Unmarried	Department of interventional surgery	2	＜5	Nurse	None	Yes	Good	4-8hours	0	0	0	0	0	1	1	1	1	1	1	1	1	1	9	3	4	4	4	4	19	4	4	4	5	5	5	5	32	60	81.0811
31	30-40	Female	≥Master	Married	Surgery department	4	＜5	The other health personnel	None	Yes	Good	4-8hours	1	1	1	1	1	1	1	1	0	1	1	1	1	1	13	4	4	4	4	4	20	4	4	4	4	4	4	4	28	61	82.4324
28	＜30	Female	Bachelor	Married	Nuclear medicine department	5	5-10years	Technicians	1	Yes	Good	4-8hours	1	1	1	1	1	1	1	1	1	1	1	1	1	1	14	4	3	5	5	5	22	5	5	5	5	5	5	5	35	71	95.9459
28	＜30	Female	Bachelor	Married	Oncology department	5	5-10years	Technicians	1	Yes	Good	4-8hours	1	1	1	1	1	1	1	1	1	1	1	1	1	1	14	4	3	5	5	5	22	5	5	5	5	5	5	5	35	71	95.9459
31	30-40	Female	Bachelor	Married	Surgery department	7	5-10years	Technicians	1	Yes	Good	4-8hours	1	1	1	1	1	1	1	1	0	1	1	1	1	1	13	4	3	4	4	4	19	5	5	5	5	5	5	5	35	67	90.5405
31	30-40	Female	Bachelor	Married	Surgery department	7	5-10years	Technicians	1	Yes	Good	4-8hours	1	1	1	1	1	1	1	1	1	1	1	1	1	1	14	4	3	4	4	4	19	5	5	5	5	5	5	5	35	68	91.8919
21	＜30	Female	Bachelor	Unmarried	Radiology department	1	＜5	Technicians	None	Yes	Good	4-8hours	1	1	1	1	1	1	1	1	1	1	1	1	1	1	14	4	4	4	4	4	20	5	5	5	5	5	5	5	35	69	93.2432
21	＜30	Female	Bachelor	Unmarried	Radiology department	1	＜5	Technicians	None	Yes	Good	4-8hours	1	1	1	1	1	1	1	1	1	1	1	1	1	1	14	4	4	4	4	4	20	4	4	4	5	5	5	5	32	66	89.1892
21	＜30	Female	Bachelor	Unmarried	Radiology department	1	＜5	Technicians	None	Yes	Good	4-8hours	1	1	1	1	1	1	1	1	0	1	1	1	1	1	13	4	4	4	4	4	20	3	3	5	5	5	5	5	31	64	86.4865
21	＜30	Female	Bachelor	Unmarried	Radiology department	1	＜5	Technicians	None	Yes	Good	4-8hours	1	1	1	1	1	1	1	1	1	1	1	1	1	1	14	4	4	4	4	4	20	3	3	5	5	5	5	5	31	65	87.8378
25	＜30	Female	≥Master	Unmarried	Oncology department	1	＜5	Technicians	None	Yes	Good	4-8hours	1	1	1	1	1	1	1	1	1	1	1	1	1	1	14	5	3	5	5	5	23	5	5	5	5	5	5	5	35	72	97.2973
25	＜30	Male	≥Master	Unmarried	Oncology department	1	＜5	Technicians	None	Yes	Good	4-8hours	1	1	1	1	1	1	1	1	0	1	1	1	1	1	13	5	5	5	5	5	25	5	5	5	5	5	5	5	35	73	98.6486
39	30-40	Male	Bachelor	Married	Endoscopic center	15	11-20years	Nurse	≥2	Yes	Bad	＜4	0	0	1	1	1	1	1	1	0	0	1	0	0	0	7	3	5	5	5	5	23	2	2	5	5	3	5	5	27	57	77.027
41	41-50	Male	Bachelor	Married	Endoscopic center	15	11-20years	Nurse	≥2	Yes	Bad	＜4	0	0	1	1	1	1	1	1	0	0	1	0	0	0	7	3	5	5	5	5	23	2	2	5	5	3	5	5	27	57	77.027
42	41-50	Male	Bachelor	Married	Surgery department	20	11-20years	Nurse	1	No	Bad	＜4	0	0	0	0	0	0	0	0	0	0	0	0	0	0	0	4	4	4	4	4	20	1	1	4	4	2	3	4	19	39	52.7027
42	41-50	Male	Bachelor	Married	Surgery department	20	11-20years	Nurse	1	No	Bad	＜4	0	0	0	0	0	0	0	0	0	0	0	0	0	0	0	3	4	4	4	4	19	1	1	4	4	2	3	4	19	38	51.3514
33	30-40	Male	Bachelor	Married	Endoscopic center	9	5-10years	Technicians	1	Yes	Bad	＜4	0	0	1	0	1	1	1	1	1	1	1	0	1	0	9	4	4	5	5	5	23	5	5	5	5	5	5	5	35	67	90.5405
33	30-40	Male	Bachelor	Married	Endoscopic center	9	5-10years	Nurse	1	Yes	Bad	＜4	0	0	1	0	1	1	1	1	1	1	1	0	1	0	9	4	4	5	5	5	23	5	5	5	5	5	5	5	35	67	90.5405
23	＜30	Male	Bachelor	Unmarried	Radiology department	1	＜5	Doctor	None	No	Average	＜4	0	0	1	0	0	0	0	0	1	0	0	0	0	0	2	3	4	5	5	5	22	5	2	4	5	5	5	5	31	55	74.3243
23	＜30	Male	Bachelor	Unmarried	Radiology department	1	＜5	Doctor	None	No	Average	＜4	0	0	1	0	0	0	0	0	1	0	0	0	0	0	2	3	4	5	5	5	22	5	2	4	5	5	5	5	31	55	74.3243
23	＜30	Male	Bachelor	Unmarried	Radiology department	1	＜5	Doctor	None	No	Average	＜4	0	0	1	0	0	0	0	0	1	0	0	0	0	0	2	3	4	5	5	5	22	5	2	4	5	5	5	5	31	55	74.3243
23	＜30	Male	Bachelor	Unmarried	Radiology department	1	＜5	Doctor	None	No	Average	＜4	0	0	1	0	0	0	0	0	1	0	0	0	0	0	2	3	4	5	5	5	22	5	2	4	5	5	5	5	31	55	74.3243
25	＜30	Male	Bachelor	Unmarried	Radiology department	1	＜5	Doctor	None	No	Average	＜4	1	1	1	1	1	1	1	1	0	1	1	0	0	0	10	4	4	4	4	4	20	5	5	5	5	5	5	5	35	65	87.8378
25	＜30	Male	Bachelor	Unmarried	Radiology department	1	＜5	Doctor	None	No	Average	＜4	1	1	1	1	1	1	1	1	1	1	1	0	0	0	11	3	3	3	3	3	15	5	5	5	5	5	5	5	35	61	82.4324
25	＜30	Male	Bachelor	Unmarried	Radiology department	1	＜5	Doctor	None	No	Average	＜4	1	1	1	1	1	1	1	1	1	1	1	0	0	0	11	3	3	4	4	4	18	5	5	5	5	5	5	5	35	64	86.4865
25	＜30	Male	Bachelor	Unmarried	Radiology department	1	＜5	Doctor	None	No	Average	＜4	1	1	1	1	1	1	1	1	1	1	1	0	0	0	11	4	4	4	4	4	20	5	5	5	5	5	5	5	35	66	89.1892
25	＜30	Male	Bachelor	Unmarried	Radiology department	1	＜5	Doctor	None	No	Average	＜4	1	1	1	1	1	1	1	1	1	1	1	0	0	0	11	4	4	4	4	4	20	4	2	5	5	5	5	5	31	62	83.7838
26	＜30	Male	Bachelor	Unmarried	Nuclear medicine department	1	＜5	Doctor	None	No	Average	＜4	1	1	1	1	1	1	0	0	1	1	1	0	0	0	9	3	4	5	5	5	22	3	4	4	3	4	3	4	25	56	75.6757
27	＜30	Male	≥Master	Unmarried	Nuclear medicine department	1	＜5	Doctor	None	No	Average	＜4	1	1	1	1	1	1	1	1	1	1	1	1	1	1	14	3	4	4	4	4	19	4	4	4	4	4	4	4	28	61	82.4324
27	＜30	Male	≥Master	Unmarried	Surgery department	1	＜5	Doctor	None	No	Average	＜4	1	1	1	0	1	1	1	1	1	1	1	1	1	1	13	4	4	4	4	4	20	4	4	4	4	4	4	4	28	61	82.4324
26	＜30	Male	Bachelor	Unmarried	Surgery department	1	＜5	Doctor	None	No	Average	＜4	1	1	1	1	1	1	0	0	1	1	1	0	0	0	9	3	4	5	5	5	22	3	4	4	3	4	3	4	25	56	75.6757
27	＜30	Male	≥Master	Unmarried	Surgery department	1	＜5	Doctor	None	No	Average	＜4	1	1	1	1	1	1	1	1	1	1	1	1	1	1	14	3	4	4	4	4	19	4	4	4	4	4	4	4	28	61	82.4324
29	＜30	Male	≥Master	Married	Oncology department	1	＜5	Doctor	None	No	Average	＜4	1	1	1	1	1	1	1	1	1	1	1	0	1	1	13	3	4	5	5	5	22	5	5	4	5	4	4	5	32	67	90.5405
29	＜30	Male	≥Master	Married	Oncology department	1	＜5	Doctor	None	No	Average	＜4	1	1	1	1	1	1	1	1	0	1	1	0	1	1	12	3	4	5	5	5	22	4	3	4	5	4	4	5	29	63	85.1351
27	＜30	Male	≥Master	Unmarried	Oncology department	1	＜5	Doctor	None	No	Average	＜4	1	1	1	1	1	1	1	1	1	1	1	1	1	1	14	4	4	5	5	5	23	5	5	5	5	5	5	5	35	72	97.2973
30	30-40	Male	≥Master	Unmarried	Radiology department	3	＜5	Doctor	None	No	Average	＜4	0	0	0	0	0	0	0	0	0	0	0	0	0	0	0	3	4	4	4	4	19	4	3	3	4	3	3	3	23	42	56.7568
30	30-40	Male	≥Master	Unmarried	Radiology department	3	＜5	Doctor	None	No	Average	＜4	0	0	0	0	0	0	0	0	0	0	0	0	0	0	0	3	4	4	4	4	19	4	3	3	4	3	3	3	23	42	56.7568
30	30-40	Male	≥Master	Unmarried	Radiology department	3	＜5	Doctor	None	No	Average	＜4	0	0	0	0	0	0	0	0	0	0	0	0	0	0	0	3	4	4	4	4	19	4	3	3	4	3	3	3	23	42	56.7568
30	30-40	Male	≥Master	Unmarried	Radiology department	3	＜5	Doctor	None	No	Average	＜4	0	0	0	0	0	0	0	0	0	0	0	0	0	0	0	3	4	4	4	4	19	4	3	3	4	3	3	3	23	42	56.7568
26	＜30	Male	≥Master	Unmarried	Surgery department	1	＜5	Nurse	None	No	Average	＜4	0	0	0	0	0	0	0	0	0	0	0	0	0	0	0	2	3	3	3	3	14	3	1	4	4	4	4	4	24	38	51.3514
26	＜30	Male	≥Master	Unmarried	Oncology department	1	＜5	Nurse	None	No	Average	＜4	0	0	0	0	0	0	0	0	0	0	0	0	0	0	0	2	4	4	4	4	18	3	1	4	4	4	4	4	24	42	56.7568
31	30-40	Male	≥Master	Married	Surgery department	9	5-10years	Nurse	1	No	Average	＜4	0	0	1	0	1	0	1	0	1	0	0	0	1	1	6	3	4	3	4	4	18	4	4	4	4	4	4	4	28	52	70.2703
39	30-40	Male	≥Master	Married	Surgery department	12	11-20years	Nurse	1	No	Average	＜4	0	0	0	0	0	0	0	0	0	0	0	0	0	0	0	3	4	4	4	4	19	1	2	2	2	2	3	2	14	33	44.5946
39	30-40	Male	≥Master	Married	Oncology department	12	11-20years	Nurse	1	No	Average	＜4	0	0	0	0	0	0	0	0	0	0	0	0	0	0	0	3	4	5	5	5	22	1	2	2	2	2	5	2	16	38	51.3514
37	30-40	Male	Bachelor	Married	Surgery department	13	11-20years	Nurse	1	No	Average	＜4	0	0	1	0	1	1	1	0	0	0	0	0	0	0	4	4	4	4	4	4	20	4	4	4	4	4	4	4	28	52	70.2703
37	30-40	Male	Bachelor	Married	Surgery department	13	11-20years	Nurse	1	No	Average	＜4	0	0	1	0	1	1	1	0	0	0	0	0	0	0	4	4	4	4	4	4	20	4	4	4	4	4	4	4	28	52	70.2703
37	30-40	Male	Bachelor	Married	Surgery department	13	11-20years	Nurse	1	No	Average	＜4	0	0	1	0	1	1	1	0	0	0	0	0	0	0	4	4	4	4	4	4	20	4	4	4	4	4	4	4	28	52	70.2703
47	41-50	Male	Bachelor	Married	Surgery department	20	11-20years	Nurse	1	No	Average	＜4	0	0	1	0	1	1	1	0	0	0	0	0	0	0	4	4	4	4	4	4	20	4	4	4	4	4	4	4	28	52	70.2703
49	41-50	Male	≥Master	Married	Surgery department	26	＞20	Nurse	1	No	Average	＜4	0	0	0	0	0	0	1	0	1	1	1	0	0	0	4	4	4	5	5	5	23	1	1	3	4	4	5	4	22	49	66.2162
49	41-50	Male	≥Master	Married	Surgery department	26	＞20	Nurse	1	No	Average	＜4	0	0	0	0	0	0	1	0	1	1	1	0	0	0	4	4	4	5	5	5	23	1	1	3	4	4	5	4	22	49	66.2162
49	41-50	Male	≥Master	Married	Surgery department	27	＞20	Nurse	1	No	Average	＜4	0	0	0	0	0	0	1	0	1	1	1	0	0	0	4	4	4	5	5	5	23	1	1	3	4	4	5	4	22	49	66.2162
49	41-50	Male	≥Master	Married	Surgery department	27	＞20	Nurse	1	No	Average	＜4	0	0	0	0	0	0	1	0	1	1	1	0	0	0	4	4	4	5	5	5	23	1	1	3	4	4	5	4	22	49	66.2162
54	＞50	Male	Bachelor	Married	Endoscopic center	35	＞20	Nurse	1	No	Average	＜4	1	0	0	0	0	0	0	0	0	1	0	0	0	0	2	4	4	2	3	4	17	2	3	1	1	3	4	3	17	36	48.6486
54	＞50	Male	Bachelor	Married	Endoscopic center	35	＞20	Nurse	1	No	Average	＜4	1	0	0	0	0	0	0	0	0	1	0	0	0	0	2	4	4	2	3	4	17	2	3	1	1	3	4	3	17	36	48.6486
41	41-50	Male	Bachelor	Married	Surgery department	17	11-20years	Nurse	≥2	No	Average	＜4	0	0	0	0	0	0	0	0	0	1	0	0	0	0	1	5	5	5	5	5	25	1	1	5	1	1	1	1	11	37	50
41	41-50	Male	Bachelor	Married	Oncology department	17	11-20years	Nurse	≥2	No	Average	＜4	0	0	0	0	0	0	0	0	0	1	0	0	0	0	1	5	5	5	5	5	25	1	1	5	1	1	1	1	11	37	50
43	41-50	Male	Bachelor	Married	Surgery department	18	11-20years	Nurse	≥2	No	Average	＜4	0	0	0	0	0	0	0	0	0	0	0	0	0	0	0	3	4	4	4	4	19	1	1	4	1	3	4	4	18	37	50
43	41-50	Male	Bachelor	Married	Surgery department	18	11-20years	Nurse	≥2	No	Average	＜4	0	0	0	0	0	0	0	0	0	0	0	0	0	0	0	3	4	5	5	5	22	1	1	4	1	3	4	4	18	40	54.0541
43	41-50	Male	Bachelor	Married	Surgery department	18	11-20years	Nurse	≥2	No	Average	＜4	0	0	0	0	0	0	0	0	0	0	0	0	0	0	0	3	4	5	5	5	22	1	1	4	1	3	4	4	18	40	54.0541
43	41-50	Male	Bachelor	Married	Surgery department	19	11-20years	Nurse	≥2	No	Average	＜4	0	0	0	0	0	0	0	0	0	0	0	0	0	0	0	3	4	5	5	5	22	1	1	4	1	3	4	4	18	40	54.0541
40	30-40	Male	Bachelor	Married	Surgery department	20	11-20years	Nurse	≥2	No	Average	＜4	0	0	0	0	0	0	0	0	0	0	0	0	0	0	0	3	4	4	4	4	19	1	1	1	1	2	4	4	14	33	44.5946
40	30-40	Male	Bachelor	Married	Surgery department	20	11-20years	Nurse	≥2	No	Average	＜4	0	0	0	0	0	0	0	0	0	0	0	0	0	0	0	3	4	5	5	5	22	1	1	1	1	2	5	5	16	38	51.3514
29	＜30	Male	≥Master	Unmarried	Nuclear medicine department	2	＜5	Doctor	None	Yes	Average	＜4	1	1	1	1	1	1	1	1	1	1	1	1	1	1	14	4	2	4	4	4	18	5	3	5	5	5	5	5	33	65	87.8378
29	＜30	Male	≥Master	Unmarried	Nuclear medicine department	2	＜5	Doctor	None	Yes	Average	＜4	1	1	1	1	1	1	1	1	1	1	1	1	1	1	14	3	2	3	3	3	14	5	3	5	5	5	5	5	33	61	82.4324
33	30-40	Male	Bachelor	Married	Radiology department	9	5-10years	Nurse	None	Yes	Average	＜4	1	0	1	1	1	1	1	1	1	1	1	1	1	0	12	5	3	5	5	5	23	5	3	5	5	5	5	5	33	68	91.8919
42	41-50	Male	≥Master	Married	Radiology department	12	11-20years	Doctor	1	Yes	Average	＜4	1	0	1	1	1	1	1	1	1	1	1	1	1	0	12	5	3	5	5	5	23	3	3	5	5	5	5	5	31	66	89.1892
30	30-40	Male	Bachelor	Married	Radiology department	8	5-10years	Technicians	1	Yes	Average	＜4	0	0	1	0	1	1	1	0	0	0	0	1	1	1	7	4	4	4	4	4	20	4	4	4	4	4	4	4	28	55	74.3243
30	30-40	Male	Bachelor	Married	Endoscopic center	6	5-10years	Nurse	1	Yes	Average	＜4	0	0	1	0	1	1	1	1	0	1	1	0	0	0	7	3	4	5	5	4	21	4	4	5	5	4	5	5	32	60	81.0811
30	30-40	Male	Bachelor	Married	Endoscopic center	6	5-10years	Nurse	1	Yes	Average	＜4	0	0	1	0	1	1	1	1	0	1	1	0	0	0	7	3	4	5	5	4	21	4	4	5	5	4	5	5	32	60	81.0811
32	30-40	Male	Bachelor	Married	Endoscopic center	6	5-10years	Nurse	1	Yes	Average	＜4	0	0	1	0	1	1	1	1	0	1	1	0	0	0	7	3	4	5	5	4	21	4	4	5	5	4	5	5	32	60	81.0811
32	30-40	Male	Bachelor	Married	Endoscopic center	6	5-10years	Nurse	1	Yes	Average	＜4	0	0	1	0	1	1	1	1	0	1	1	0	0	0	7	3	4	5	5	4	21	4	4	5	5	4	5	5	32	60	81.0811
33	30-40	Male	Bachelor	Married	Surgery department	6	5-10years	Nurse	1	Yes	Average	＜4	0	1	0	1	1	0	0	0	0	0	0	0	0	0	3	4	4	4	4	4	20	4	4	4	4	3	3	4	26	49	66.2162
33	30-40	Male	Bachelor	Married	Radiology department	9	5-10years	Nurse	1	Yes	Average	＜4	1	0	1	1	1	1	1	1	1	1	1	1	1	0	12	5	3	5	5	5	23	5	3	5	5	5	5	5	33	68	91.8919
32	30-40	Male	Bachelor	Married	Oncology department	9	5-10years	Nurse	1	Yes	Average	＜4	0	1	0	1	1	0	0	0	0	0	0	0	0	0	3	4	4	4	4	4	20	4	4	4	4	3	3	4	26	49	66.2162
43	41-50	Male	≥Master	Married	Radiology department	13	11-20years	Nurse	1	Yes	Average	＜4	1	0	1	1	1	1	1	1	1	1	1	1	1	0	12	5	3	5	5	5	23	4	3	5	5	5	5	5	32	67	90.5405
36	30-40	Male	Bachelor	Married	Surgery department	13	11-20years	Nurse	1	Yes	Average	＜4	1	0	0	0	0	0	1	0	0	0	1	0	0	0	3	5	4	5	5	5	24	4	4	4	5	5	5	5	32	59	79.7297
37	30-40	Male	Bachelor	Married	Oncology department	13	11-20years	Nurse	1	Yes	Average	＜4	1	0	0	0	0	0	1	0	0	0	1	0	0	0	3	5	4	5	5	5	24	4	4	4	5	5	5	5	32	59	79.7297
35	30-40	Male	Bachelor	Married	Oncology department	14	11-20years	Nurse	1	Yes	Average	＜4	1	1	1	1	1	1	1	1	0	1	1	0	0	0	10	2	4	3	5	5	19	5	5	5	5	4	5	5	34	63	85.1351
35	30-40	Male	Bachelor	Married	Oncology department	14	11-20years	Nurse	1	Yes	Average	＜4	1	1	1	1	1	1	1	1	0	1	1	0	0	0	10	2	4	3	5	5	19	5	5	5	5	4	5	5	34	63	85.1351
39	30-40	Male	Bachelor	Married	Oncology department	14	11-20years	Nurse	1	Yes	Average	＜4	1	1	1	1	1	1	1	1	1	1	1	0	0	0	11	2	4	5	5	5	21	5	5	5	5	4	5	5	34	66	89.1892
42	41-50	Male	Bachelor	Married	Endoscopic center	28	＞20	Nurse	1	Yes	Average	＜4	0	0	0	0	1	0	0	0	0	1	1	0	0	0	3	4	4	4	5	5	22	4	4	5	4	4	5	4	30	55	74.3243
42	41-50	Male	Bachelor	Married	Endoscopic center	28	＞20	Nurse	1	Yes	Average	＜4	0	0	0	0	1	0	0	0	0	1	1	0	0	0	3	4	4	4	5	5	22	4	4	5	4	4	5	4	30	55	74.3243
31	30-40	Male	Bachelor	Married	Radiology department	8	5-10years	The other health personnel	1	Yes	Average	＜4	1	0	0	1	1	1	0	1	1	0	0	1	0	1	8	4	4	4	4	4	20	3	3	4	4	4	4	4	26	54	72.973
29	＜30	Male	Bachelor	Married	Endoscopic center	10	5-10years	Nurse	1	Yes	Average	＜4	0	0	0	0	1	0	0	1	0	0	0	0	0	0	2	2	3	4	4	4	17	3	1	5	4	2	4	4	23	42	56.7568
29	＜30	Male	Bachelor	Married	Endoscopic center	10	5-10years	Nurse	1	Yes	Average	＜4	0	0	0	0	1	0	0	1	0	0	0	0	0	0	2	2	3	4	4	4	17	3	1	5	4	2	4	4	23	42	56.7568
25	＜30	Male	Bachelor	Unmarried	Department of interventional surgery	2	＜5	Doctor	None	No	Good	＜4	0	1	1	1	0	0	1	0	0	1	0	0	0	0	5	4	3	5	4	5	21	4	4	4	4	5	3	4	28	54	72.973
25	＜30	Male	Bachelor	Unmarried	Department of interventional surgery	2	＜5	Doctor	None	No	Good	＜4	0	1	1	1	0	0	1	0	0	1	0	0	0	0	5	4	3	5	4	5	21	4	4	4	4	5	3	4	28	54	72.973
25	＜30	Male	Bachelor	Unmarried	Department of interventional surgery	2	＜5	Doctor	None	No	Good	＜4	0	1	1	1	0	0	1	0	0	1	0	0	0	0	5	4	3	5	4	5	21	4	4	4	4	5	3	4	28	54	72.973
25	＜30	Male	Bachelor	Unmarried	Department of interventional surgery	2	＜5	Doctor	None	No	Good	＜4	0	1	1	1	0	0	1	0	0	1	0	0	0	0	5	4	3	5	4	5	21	4	4	4	4	5	3	4	28	54	72.973
22	＜30	Male	Bachelor	Unmarried	Radiology department	1	＜5	Technicians	None	No	Good	＜4	1	1	1	1	1	1	1	1	0	1	1	1	1	1	13	4	4	4	4	4	20	5	5	5	4	4	4	5	32	65	87.8378
22	＜30	Male	Bachelor	Unmarried	Radiology department	1	＜5	Technicians	None	No	Good	＜4	1	1	1	1	1	1	1	1	0	1	1	1	1	1	13	4	4	4	4	4	20	5	5	5	4	4	4	5	32	65	87.8378
22	＜30	Male	Bachelor	Unmarried	Radiology department	1	＜5	Technicians	None	No	Good	＜4	1	1	1	1	1	1	1	1	0	1	1	1	1	1	13	4	4	4	4	4	20	5	5	5	4	4	4	5	32	65	87.8378
24	＜30	Male	Bachelor	Unmarried	Radiology department	2	＜5	Technicians	None	No	Good	＜4	1	0	1	1	1	1	0	1	0	1	1	1	1	1	11	4	4	4	4	4	20	3	4	4	4	4	4	5	28	59	79.7297
29	＜30	Male	Bachelor	Unmarried	Surgery department	8	5-10years	Nurse	None	No	Good	＜4	0	0	0	0	1	1	1	0	0	1	0	0	0	0	4	3	4	5	5	5	22	1	1	1	5	5	5	5	23	49	66.2162
29	＜30	Male	Bachelor	Unmarried	Surgery department	8	5-10years	Nurse	None	No	Good	＜4	0	0	0	0	1	1	1	0	0	1	0	0	0	0	4	3	4	5	5	5	22	1	1	1	5	5	5	5	23	49	66.2162
29	＜30	Male	Bachelor	Unmarried	Surgery department	8	5-10years	Nurse	None	No	Good	＜4	0	0	0	0	1	1	1	0	0	1	0	0	0	0	4	5	5	5	5	5	25	1	1	1	5	5	5	5	23	52	70.2703
29	＜30	Male	Bachelor	Unmarried	Surgery department	9	5-10years	Nurse	None	No	Good	＜4	0	0	0	0	1	1	1	0	0	1	0	0	0	0	4	5	5	5	5	5	25	1	1	1	5	5	5	5	23	52	70.2703
32	30-40	Male	Bachelor	Unmarried	Surgery department	10	5-10years	Nurse	None	No	Good	＜4	0	0	0	0	0	0	0	0	0	1	0	0	0	0	1	3	2	3	3	3	14	1	5	5	5	5	5	5	31	46	62.1622
32	30-40	Male	Bachelor	Unmarried	Surgery department	10	5-10years	Nurse	None	No	Good	＜4	0	0	0	0	0	0	0	0	0	1	0	0	0	0	1	3	2	3	3	5	16	1	5	5	5	5	5	5	31	48	64.8649
33	30-40	Male	Bachelor	Unmarried	Surgery department	10	5-10years	Nurse	None	No	Good	＜4	0	0	0	0	0	0	0	0	0	1	0	0	0	0	1	5	2	5	5	5	22	1	5	5	5	5	5	5	31	54	72.973
33	30-40	Male	Bachelor	Unmarried	Surgery department	10	5-10years	Nurse	None	No	Good	＜4	0	0	0	0	0	0	0	0	0	1	0	0	0	0	1	5	2	5	5	5	22	1	5	5	5	5	5	5	31	54	72.973
33	30-40	Male	Bachelor	Married	Endoscopic center	10	5-10years	Nurse	1	No	Good	＜4	0	0	1	0	1	0	0	0	0	1	0	0	0	0	3	4	3	5	5	5	22	5	5	5	5	2	3	4	29	54	72.973
31	30-40	Male	Bachelor	Married	Endoscopic center	10	5-10years	Nurse	1	No	Good	＜4	1	0	0	0	1	1	1	1	1	0	1	0	0	0	7	5	4	4	5	4	22	5	2	5	5	3	5	5	30	59	79.7297
31	30-40	Male	Bachelor	Married	Endoscopic center	10	5-10years	Nurse	1	No	Good	＜4	1	0	0	0	1	1	1	1	1	0	1	0	0	0	7	5	4	4	5	4	22	5	2	5	5	3	5	5	30	59	79.7297
34	30-40	Male	Bachelor	Married	Surgery department	10	5-10years	Nurse	1	No	Good	＜4	0	0	0	0	0	0	0	0	0	0	0	0	0	0	0	4	4	4	4	4	20	5	5	5	5	3	4	3	30	50	67.5676
34	30-40	Male	Bachelor	Married	Oncology department	10	5-10years	Nurse	1	No	Good	＜4	0	0	0	0	0	0	0	0	0	0	0	0	0	0	0	3	3	3	3	3	15	5	5	5	5	3	4	3	30	45	60.8108
38	30-40	Male	Bachelor	Married	Department of interventional surgery	20	11-20years	Nurse	1	No	Good	＜4	1	0	1	0	0	0	0	0	0	1	1	0	0	0	4	4	4	4	4	4	20	1	1	4	4	1	5	3	19	43	58.1081
43	41-50	Male	Bachelor	Married	Endoscopic center	20	11-20years	Nurse	1	No	Good	＜4	0	0	1	0	1	0	0	0	0	1	0	0	0	0	3	4	3	5	5	5	22	5	5	5	5	2	3	4	29	54	72.973
38	30-40	Male	Bachelor	Married	Surgery department	20	11-20years	Nurse	1	No	Good	＜4	1	0	1	0	0	0	0	0	0	1	1	0	0	0	4	4	4	4	4	4	20	1	1	4	4	1	5	3	19	43	58.1081
41	41-50	Male	Bachelor	Married	Endoscopic center	22	＞20	Nurse	1	No	Good	＜4	1	0	0	0	1	1	1	1	1	1	1	0	0	0	8	3	2	4	5	4	18	3	4	5	5	5	5	5	32	58	78.3784
41	41-50	Male	Bachelor	Married	Endoscopic center	22	＞20	Nurse	1	No	Good	＜4	1	0	0	0	1	1	1	1	1	1	1	0	0	0	8	3	2	4	5	4	18	3	4	5	5	5	5	5	32	58	78.3784
28	＜30	Male	College and below	Married	Radiology department	17	11-20years	The other health personnel	1	No	Good	＜4	0	0	0	0	0	0	1	0	0	1	0	0	0	0	2	3	4	4	4	4	19	1	1	1	1	2	1	1	8	29	39.1892
60	＞50	Male	College and below	Married	Radiology department	18	11-20years	The other health personnel	1	No	Good	＜4	0	0	0	1	0	0	1	0	0	1	0	0	0	0	3	3	4	4	4	4	19	1	1	1	1	2	1	1	8	30	40.5405
60	＞50	Male	College and below	Married	Radiology department	18	11-20years	The other health personnel	1	No	Good	＜4	0	0	0	0	0	0	1	0	0	1	0	0	0	0	2	3	4	4	4	4	19	1	1	1	1	2	1	1	8	29	39.1892
30	30-40	Male	Bachelor	Married	Radiology department	8	5-10years	Technicians	≥2	No	Good	＜4	1	1	0	1	1	1	1	1	0	1	1	1	0	0	10	4	4	5	5	5	23	5	4	4	5	5	5	5	33	66	89.1892
28	＜30	Male	Bachelor	Married	Radiology department	5	5-10years	Nurse	≥2	No	Good	＜4	0	0	0	1	1	1	1	1	0	1	1	0	0	0	7	4	4	5	5	5	23	5	4	4	5	5	5	5	33	63	85.1351
28	＜30	Male	Bachelor	Married	Endoscopic center	7	5-10years	Nurse	≥2	No	Good	＜4	0	1	0	0	1	1	0	0	0	1	0	0	0	0	4	3	2	5	5	5	20	5	5	5	5	4	5	5	34	58	78.3784
28	＜30	Male	Bachelor	Married	Endoscopic center	7	5-10years	Nurse	≥2	No	Good	＜4	0	1	0	0	1	1	0	0	0	1	0	0	0	0	4	3	2	5	5	5	20	5	5	5	5	4	5	5	34	58	78.3784
30	30-40	Male	Bachelor	Married	Radiology department	8	5-10years	Nurse	≥2	No	Good	＜4	1	1	0	1	1	1	1	1	0	1	1	1	0	0	10	4	4	5	5	5	23	5	4	4	5	5	5	5	33	66	89.1892
32	30-40	Male	Bachelor	Married	Radiology department	8	5-10years	Nurse	≥2	No	Good	＜4	1	1	0	1	1	1	1	1	0	1	1	1	0	0	10	4	4	5	5	5	23	5	4	4	5	5	5	5	33	66	89.1892
30	30-40	Male	≥Master	Unmarried	Oncology department	2	＜5	Doctor	None	Yes	Good	＜4	1	1	1	1	1	1	1	1	0	1	1	0	0	1	11	4	5	5	5	5	24	3	4	4	4	5	5	5	30	65	87.8378
30	30-40	Male	≥Master	Unmarried	Oncology department	2	＜5	Doctor	None	Yes	Good	＜4	1	1	1	1	1	1	1	1	1	1	1	0	0	1	12	4	5	5	5	5	24	3	4	4	4	5	5	5	30	66	89.1892
24	＜30	Male	Bachelor	Unmarried	Nuclear medicine department	1	＜5	Technicians	None	Yes	Good	＜4	0	0	1	1	1	1	1	0	0	1	1	0	0	1	8	4	3	5	5	5	22	5	5	5	5	5	5	5	35	65	87.8378
24	＜30	Male	Bachelor	Unmarried	Surgery department	1	＜5	Technicians	None	Yes	Good	＜4	0	0	1	1	1	1	1	0	0	1	1	0	0	1	8	4	3	5	5	5	22	5	5	5	5	5	5	5	35	65	87.8378
28	＜30	Male	Bachelor	Unmarried	Radiology department	4	＜5	Technicians	None	Yes	Good	＜4	1	1	1	1	1	1	1	1	1	1	1	1	1	1	14	4	3	5	5	5	22	5	5	5	5	5	5	5	35	71	95.9459
28	＜30	Male	≥Master	Unmarried	Radiology department	4	＜5	Technicians	None	Yes	Good	＜4	1	1	1	1	1	1	1	1	1	1	1	1	1	1	14	4	3	5	5	5	22	5	5	5	5	5	5	5	35	71	95.9459
28	＜30	Male	Bachelor	Unmarried	Radiology department	4	＜5	Nurse	None	Yes	Good	＜4	1	1	1	1	1	1	1	1	1	1	1	1	1	1	14	4	3	5	5	5	22	5	5	5	5	5	5	5	35	71	95.9459
28	＜30	Male	≥Master	Unmarried	Radiology department	4	＜5	Nurse	None	Yes	Good	＜4	1	1	1	1	1	1	1	1	1	1	1	1	1	1	14	4	3	5	5	5	22	5	5	5	5	5	5	5	35	71	95.9459
40	30-40	Male	≥Master	Married	Radiology department	12	11-20years	Doctor	1	Yes	Good	＜4	1	1	1	1	1	1	1	1	0	1	0	0	1	1	11	4	5	4	3	4	20	4	4	3	3	3	5	4	26	57	77.027
40	30-40	Male	≥Master	Married	Radiology department	12	11-20years	Doctor	1	Yes	Good	＜4	1	1	1	1	1	1	1	1	0	1	0	0	1	1	11	4	5	4	3	4	20	4	4	3	3	3	5	4	26	57	77.027
40	30-40	Male	≥Master	Married	Radiology department	12	11-20years	Doctor	1	Yes	Good	＜4	1	1	1	1	1	1	1	1	0	1	0	0	1	1	11	4	5	4	3	4	20	4	4	3	3	3	5	4	26	57	77.027
42	41-50	Male	≥Master	Married	Radiology department	14	11-20years	Doctor	1	Yes	Good	＜4	1	0	1	1	1	1	1	1	0	1	0	0	1	1	10	4	4	4	3	4	19	4	3	3	3	3	5	4	25	54	72.973
36	30-40	Male	Bachelor	Married	Radiology department	13	11-20years	Technicians	1	Yes	Good	＜4	0	0	1	0	1	1	1	1	1	1	1	1	1	1	11	4	4	4	4	4	20	5	2	5	5	5	5	5	32	63	85.1351
34	30-40	Male	≥Master	Married	Surgery department	10	5-10years	Nurse	1	Yes	Good	＜4	0	0	0	0	0	0	0	0	0	1	1	0	0	0	2	4	3	5	5	5	22	2	2	2	2	4	4	4	20	44	59.4595
34	30-40	Male	≥Master	Married	Oncology department	10	5-10years	Nurse	1	Yes	Good	＜4	0	0	0	0	0	0	0	0	0	1	1	0	0	0	2	4	3	5	5	5	22	2	2	2	2	4	4	4	20	44	59.4595
34	30-40	Male	Bachelor	Married	Oncology department	12	11-20years	Nurse	1	Yes	Good	＜4	0	0	1	1	0	0	1	0	0	1	1	0	0	0	5	4	4	5	5	5	23	2	3	5	5	5	5	5	30	58	78.3784
36	30-40	Male	Bachelor	Married	Radiology department	13	11-20years	Nurse	1	Yes	Good	＜4	0	0	1	0	1	1	1	1	1	1	1	1	1	1	11	4	4	4	4	4	20	4	2	5	5	5	5	5	31	62	83.7838
41	41-50	Male	Bachelor	Married	Oncology department	14	11-20years	Nurse	1	Yes	Good	＜4	0	0	1	1	0	0	1	0	0	1	1	0	0	0	5	4	4	3	5	5	21	2	3	5	5	5	5	5	30	56	75.6757
39	30-40	Male	≥Master	Married	Surgery department	10	5-10years	Doctor	≥2	Yes	Good	＜4	1	1	1	1	1	1	0	0	1	1	1	1	1	0	11	5	5	5	5	5	25	4	4	5	5	5	5	5	33	69	93.2432
39	30-40	Male	≥Master	Married	Oncology department	10	5-10years	Doctor	≥2	Yes	Good	＜4	1	1	1	1	1	1	0	0	1	1	1	1	1	0	11	5	5	5	5	5	25	4	4	5	5	5	5	5	33	69	93.2432
32	30-40	Male	Bachelor	Married	Oncology department	7	5-10years	Nurse	None	No	Good	＜4	1	1	1	1	1	1	1	1	0	1	1	1	1	1	13	5	5	5	5	5	25	1	1	5	5	5	5	5	27	65	87.8378
32	30-40	Male	Bachelor	Married	Oncology department	7	5-10years	Nurse	None	No	Good	＜4	1	1	1	1	1	1	1	1	1	1	1	1	1	1	14	5	5	5	5	5	25	1	1	5	5	5	5	5	27	66	89.1892
53	＞50	Male	Bachelor	Married	Radiology department	35	＞20	Doctor	1	No	Good	＜4	1	1	1	1	1	1	1	1	1	1	1	1	1	1	14	5	3	5	5	5	23	5	5	5	5	5	5	5	35	72	97.2973
53	＞50	Male	Bachelor	Married	Radiology department	35	＞20	Doctor	1	No	Good	＜4	1	1	1	1	1	1	1	1	1	1	1	1	1	1	14	5	3	5	5	5	23	5	5	5	5	5	5	5	35	72	97.2973
53	＞50	Male	Bachelor	Married	Radiology department	35	＞20	Technicians	1	No	Good	＜4	1	1	1	1	1	1	1	1	1	1	1	1	1	1	14	5	3	5	5	5	23	5	5	5	5	5	5	5	35	72	97.2973
53	＞50	Male	Bachelor	Married	Radiology department	35	＞20	Nurse	1	No	Good	＜4	1	1	1	1	1	1	1	1	1	1	1	1	1	1	14	5	3	5	5	5	23	5	5	5	5	5	5	5	35	72	97.2973
33	30-40	Male	≥Master	Married	Nuclear medicine department	7	5-10years	Doctor	1	Yes	Good	＜4	1	1	1	1	1	1	1	1	1	1	1	0	1	1	13	3	4	5	5	5	22	5	5	5	5	5	5	5	35	70	94.5946
33	30-40	Male	≥Master	Married	Nuclear medicine department	7	5-10years	Doctor	1	Yes	Good	＜4	1	1	1	1	1	1	1	1	1	1	1	0	1	1	13	3	4	5	5	5	22	4	4	5	5	5	5	5	33	68	91.8919
32	30-40	Male	≥Master	Married	Radiology department	9	5-10years	Doctor	1	Yes	Good	＜4	1	1	1	1	1	1	1	1	1	1	1	1	1	1	14	5	4	5	5	5	24	5	5	5	5	5	5	5	35	73	98.6486
32	30-40	Male	Bachelor	Married	Radiology department	9	5-10years	Technicians	1	Yes	Good	＜4	1	1	1	1	1	1	1	1	1	1	1	1	1	1	14	4	2	4	4	4	18	5	5	5	5	5	5	5	35	67	90.5405
32	30-40	Male	Bachelor	Married	Radiology department	9	5-10years	Technicians	1	Yes	Good	＜4	1	1	1	1	1	1	1	1	1	1	1	1	1	1	14	4	4	4	4	4	20	5	5	5	5	5	5	5	35	69	93.2432
44	41-50	Male	≥Master	Married	Radiology department	15	11-20years	Nurse	1	Yes	Good	＜4	1	1	1	1	1	1	1	1	1	1	1	1	1	1	14	5	4	5	5	5	24	5	5	5	5	5	5	5	35	73	98.6486
51	＞50	Male	College and below	Married	Radiology department	4	＜5	The other health personnel	1	Yes	Good	＜4	0	0	0	1	1	1	0	0	1	0	1	1	0	1	7	5	3	5	5	5	23	3	3	3	5	4	4	5	27	57	77.027
51	＞50	Male	College and below	Married	Radiology department	4	＜5	The other health personnel	1	Yes	Good	＜4	0	0	0	1	1	1	1	1	1	1	0	0	0	1	8	5	3	5	4	5	22	3	2	3	3	3	4	3	21	51	68.9189
51	＞50	Male	College and below	Married	Radiology department	4	＜5	The other health personnel	1	Yes	Good	＜4	0	0	0	1	1	1	1	0	1	0	1	0	0	1	7	3	3	3	3	3	15	3	2	3	4	4	4	3	23	45	60.8108
54	＞50	Male	College and below	Married	Radiology department	16	11-20years	The other health personnel	1	Yes	Good	＜4	0	0	1	0	1	1	1	0	1	1	0	0	0	1	7	5	3	5	5	5	23	3	3	3	4	5	4	4	26	56	75.6757
60	＞50	Male	College and below	Married	Radiology department	15	11-20years	Technicians	≥2	Yes	Good	＜4	0	0	0	1	1	1	1	1	0	1	0	1	1	1	9	4	3	4	4	4	19	3	3	3	3	3	4	4	23	51	68.9189
56	＞50	Male	College and below	Married	Radiology department	12	11-20years	The other health personnel	≥2	Yes	Good	＜4	0	0	1	1	1	1	1	1	0	0	1	0	0	1	8	4	3	4	3	5	19	3	3	4	4	4	4	4	26	53	71.6216
61	＞50	Male	College and below	Married	Radiology department	15	11-20years	The other health personnel	≥2	Yes	Good	＜4	0	0	1	1	0	1	1	0	1	0	1	1	1	1	9	5	3	5	5	5	23	4	4	3	4	3	4	4	26	58	78.3784
61	＞50	Male	College and below	Married	Radiology department	18	11-20years	The other health personnel	≥2	Yes	Good	＜4	0	0	1	0	1	1	1	0	0	0	1	1	0	1	7	5	3	5	5	4	22	3	3	4	4	5	4	4	27	56	75.6757
33	30-40	Male	Bachelor	Married	Radiology department	10	5-10years	Nurse	None	No	Average	＜4	1	0	0	1	0	0	1	0	1	1	1	0	0	0	6	3	3	3	3	3	15	3	2	4	4	4	4	4	25	46	62.1622
33	30-40	Male	Bachelor	Married	Radiology department	10	5-10years	Nurse	None	No	Average	＜4	1	0	0	1	0	0	1	0	1	1	1	0	0	0	6	3	4	4	4	4	19	4	2	4	4	4	4	4	26	51	68.9189
30	30-40	Male	≥Master	Unmarried	Nuclear medicine department	7	5-10years	Doctor	None	Yes	Average	＜4	1	0	1	1	1	1	1	1	1	1	0	1	0	0	10	5	4	5	5	5	24	5	5	5	5	5	5	5	35	69	93.2432
32	30-40	Male	≥Master	Unmarried	Nuclear medicine department	7	5-10years	Doctor	None	Yes	Average	＜4	1	0	1	1	1	1	1	1	1	1	0	1	0	0	10	5	4	5	5	5	24	5	5	5	5	5	5	5	35	69	93.2432
28	＜30	Male	Bachelor	Divorced	Surgery department	7	5-10years	Doctor	None	Yes	Average	＜4	0	0	1	0	1	1	1	1	1	1	1	1	0	0	9	4	5	5	5	5	24	3	5	5	5	5	5	5	33	66	89.1892
33	30-40	Male	Bachelor	Unmarried	Surgery department	10	5-10years	Doctor	None	Yes	Average	＜4	1	1	1	1	1	1	1	1	1	1	1	1	1	1	14	3	4	5	5	5	22	5	3	5	5	5	5	5	33	69	93.2432
33	30-40	Male	≥Master	Unmarried	Oncology department	10	5-10years	Doctor	None	Yes	Average	＜4	1	1	1	1	1	1	1	1	1	1	1	1	1	1	14	3	4	5	5	5	22	5	3	5	5	5	5	5	33	69	93.2432
28	＜30	Male	Bachelor	Divorced	Oncology department	7	5-10years	Technicians	None	Yes	Average	＜4	0	0	1	0	1	1	1	1	1	1	1	1	0	0	9	5	5	5	5	5	25	3	5	5	5	5	5	5	33	67	90.5405
42	41-50	Male	≥Master	Married	Radiology department	15	11-20years	Doctor	1	Yes	Average	＜4	1	0	1	1	1	1	1	1	1	1	1	1	0	0	11	5	5	5	5	5	25	5	5	5	5	5	5	5	35	71	95.9459
36	30-40	Male	≥Master	Married	Radiology department	15	11-20years	Technicians	1	Yes	Average	＜4	1	0	1	1	1	1	1	1	1	1	1	1	0	0	11	5	5	5	5	5	25	5	5	5	5	5	5	5	35	71	95.9459
42	41-50	Male	Bachelor	Married	Radiology department	15	11-20years	Nurse	1	Yes	Average	＜4	1	0	1	1	1	1	1	1	1	1	1	1	0	0	11	5	5	5	5	5	25	5	5	5	5	5	5	5	35	71	95.9459
45	41-50	Male	≥Master	Married	Radiology department	15	11-20years	Nurse	1	Yes	Average	＜4	1	0	1	1	1	1	1	1	1	1	1	1	0	0	11	5	5	5	5	5	25	5	5	5	5	5	5	5	35	71	95.9459
30	30-40	Male	Bachelor	Married	Oncology department	7	5-10years	Technicians	1	Yes	Good	＜4	1	0	1	1	1	1	1	0	1	0	0	0	0	0	7	3	4	5	5	5	22	5	4	4	4	5	5	4	31	60	81.0811
30	30-40	Male	Bachelor	Married	Nuclear medicine department	7	5-10years	Nurse	1	Yes	Good	＜4	1	0	1	1	1	1	1	0	1	0	0	0	0	0	7	3	4	4	4	4	19	4	4	4	4	4	4	4	28	54	72.973
30	30-40	Male	Bachelor	Married	Nuclear medicine department	7	5-10years	Nurse	1	Yes	Good	＜4	1	0	1	1	1	1	1	0	1	0	0	0	0	0	7	3	4	5	5	5	22	5	4	4	4	5	5	4	31	60	81.0811
30	30-40	Male	Bachelor	Married	Surgery department	7	5-10years	Nurse	1	Yes	Good	＜4	1	0	1	1	1	1	1	0	1	0	0	0	0	0	7	3	4	5	5	5	22	5	4	4	4	5	5	4	31	60	81.0811
33	30-40	Male	≥Master	Married	Surgery department	3	＜5	The other health personnel	1	Yes	Good	＜4	1	1	1	1	1	1	1	1	0	1	1	1	1	1	13	3	3	5	5	5	21	4	2	4	5	5	5	5	30	64	86.4865
33	30-40	Male	≥Master	Married	Oncology department	3	＜5	The other health personnel	1	Yes	Good	＜4	1	1	1	1	1	1	1	1	0	1	1	1	1	1	13	3	3	5	5	5	21	4	2	4	5	5	5	5	30	64	86.4865
60	＞50	Male	College and below	Divorced	Surgery department	4	＜5	The other health personnel	1	Yes	Good	＜4	1	0	0	1	1	0	0	0	0	1	1	1	1	1	8	5	3	4	4	4	20	5	1	4	4	4	4	5	27	55	74.3243
60	＞50	Male	College and below	Divorced	Oncology department	4	＜5	The other health personnel	1	Yes	Good	＜4	1	0	0	1	1	0	0	0	0	1	1	1	1	1	8	5	3	4	4	4	20	5	1	4	4	4	4	5	27	55	74.3243
36	30-40	Male	College and below	Married	Nuclear medicine department	1	＜5	Technicians	≥2	No	Good	＜4	0	0	1	1	1	0	0	0	1	1	1	1	1	0	8	5	4	4	4	4	21	5	4	4	4	4	4	3	28	57	77.027
36	30-40	Male	College and below	Married	Oncology department	1	＜5	The other health personnel	≥2	No	Good	＜4	0	0	1	1	1	0	0	0	1	1	1	1	1	0	8	5	4	4	4	4	21	5	4	4	4	4	4	3	28	57	77.027
31	30-40	Male	Bachelor	Married	Surgery department	8	5-10years	Nurse	1	No	Bad	4-8hours	0	0	0	0	0	0	0	0	0	0	0	0	0	0	0	3	4	5	5	5	22	1	1	2	3	1	2	1	11	33	44.5946
31	30-40	Male	Bachelor	Married	Oncology department	8	5-10years	Nurse	1	No	Bad	4-8hours	0	0	0	0	0	0	0	0	0	0	0	0	0	0	0	3	3	4	4	4	18	1	1	2	3	1	2	1	11	29	39.1892
36	30-40	Male	Bachelor	Married	Department of interventional surgery	11	11-20years	Nurse	1	No	Average	4-8hours	1	0	1	1	1	1	1	1	0	1	1	1	1	1	12	5	5	5	5	5	25	2	1	5	4	3	5	5	25	62	83.7838
36	30-40	Male	Bachelor	Married	Department of interventional surgery	11	11-20years	Nurse	1	No	Average	4-8hours	1	0	1	1	1	1	1	1	1	1	1	1	1	1	13	5	5	5	5	5	25	2	1	5	4	3	5	5	25	63	85.1351
36	30-40	Male	Bachelor	Married	Department of interventional surgery	11	11-20years	Nurse	1	No	Average	4-8hours	1	0	1	1	1	1	1	1	0	1	1	1	1	1	12	5	5	5	5	5	25	2	1	5	4	3	5	5	25	62	83.7838
36	30-40	Male	Bachelor	Married	Department of interventional surgery	11	11-20years	Nurse	1	No	Average	4-8hours	1	0	1	1	1	1	1	1	1	1	1	1	1	1	13	5	5	5	5	5	25	2	1	5	4	3	5	5	25	63	85.1351
36	30-40	Male	Bachelor	Married	Department of interventional surgery	11	11-20years	Nurse	1	No	Average	4-8hours	1	0	1	1	1	1	1	1	1	1	1	1	1	1	13	5	5	5	5	5	25	2	1	5	4	3	5	5	25	63	85.1351
36	30-40	Male	Bachelor	Married	Department of interventional surgery	11	11-20years	Nurse	1	No	Average	4-8hours	1	0	1	1	1	1	1	1	0	1	1	1	1	1	12	5	5	5	5	5	25	2	1	5	4	3	5	5	25	62	83.7838
41	41-50	Male	Bachelor	Married	Department of interventional surgery	16	11-20years	Nurse	1	No	Average	4-8hours	1	0	1	1	1	1	1	1	1	1	1	1	1	1	13	5	5	5	5	5	25	2	1	5	4	3	5	5	25	63	85.1351
45	41-50	Male	≥Master	Married	Department of interventional surgery	17	11-20years	Nurse	1	No	Average	4-8hours	1	0	1	1	1	1	1	1	1	1	1	1	1	1	13	5	5	5	5	5	25	2	1	5	4	3	5	5	25	63	85.1351
49	41-50	Male	Bachelor	Married	Radiology department	24	＞20	Nurse	1	Yes	Average	4-8hours	0	1	1	1	1	1	1	1	1	1	1	1	1	1	13	4	3	5	5	5	22	4	1	5	5	3	5	4	27	62	83.7838
50	41-50	Male	Bachelor	Married	Radiology department	25	＞20	Nurse	1	Yes	Average	4-8hours	0	1	1	1	1	1	1	1	1	1	1	1	1	1	13	4	3	5	5	5	22	4	2	5	5	3	5	4	28	63	85.1351
50	41-50	Male	Bachelor	Married	Radiology department	25	＞20	Nurse	1	Yes	Average	4-8hours	0	1	1	1	1	1	1	1	1	1	1	1	1	1	13	4	3	5	5	5	22	4	1	5	5	3	5	4	27	62	83.7838
50	41-50	Male	Bachelor	Married	Radiology department	25	＞20	Nurse	1	Yes	Average	4-8hours	0	1	1	1	1	1	1	1	1	1	1	1	1	1	13	4	3	5	5	5	22	4	2	5	5	3	5	4	28	63	85.1351
50	41-50	Male	Bachelor	Married	Radiology department	25	＞20	Nurse	1	Yes	Average	4-8hours	0	1	1	1	1	1	1	1	1	1	1	1	1	1	13	4	3	5	5	5	22	4	2	5	5	3	5	4	28	63	85.1351
50	41-50	Male	Bachelor	Married	Radiology department	25	＞20	Nurse	1	Yes	Average	4-8hours	0	1	1	1	1	1	1	1	1	1	1	1	1	1	13	4	3	5	5	5	22	4	2	5	5	3	5	4	28	63	85.1351
48	41-50	Male	Bachelor	Married	Radiology department	26	＞20	Nurse	1	Yes	Average	4-8hours	0	0	1	1	1	1	1	1	0	0	0	1	1	1	9	4	3	5	5	5	22	4	2	5	5	3	5	4	28	59	79.7297
52	＞50	Male	Bachelor	Married	Radiology department	27	＞20	Nurse	1	Yes	Average	4-8hours	0	1	1	1	1	1	1	1	1	1	1	1	1	1	13	4	3	5	5	5	22	4	2	5	5	3	5	4	28	63	85.1351
30	30-40	Male	≥Master	Unmarried	Nuclear medicine department	3	＜5	Doctor	None	Yes	Good	4-8hours	1	1	1	1	1	1	1	1	0	1	1	1	1	1	13	4	4	4	4	4	20	5	5	5	5	5	5	5	35	68	91.8919
30	30-40	Male	≥Master	Unmarried	Nuclear medicine department	3	＜5	Doctor	None	Yes	Good	4-8hours	1	1	1	1	1	1	1	1	1	1	1	1	1	1	14	4	4	4	4	4	20	5	5	5	5	5	5	5	35	69	93.2432
28	＜30	Male	Bachelor	Unmarried	Radiology department	5	5-10years	Doctor	None	Yes	Good	4-8hours	0	1	1	1	1	1	1	1	1	1	1	0	0	0	10	3	4	5	5	5	22	5	3	4	4	5	5	4	30	62	83.7838
28	＜30	Male	Bachelor	Unmarried	Radiology department	5	5-10years	Doctor	None	Yes	Good	4-8hours	0	1	1	1	1	1	1	1	1	1	1	0	0	0	10	3	4	5	5	5	22	5	3	4	4	5	5	4	30	62	83.7838
28	＜30	Male	Bachelor	Unmarried	Radiology department	5	5-10years	Doctor	None	Yes	Good	4-8hours	0	1	1	1	1	1	1	1	1	1	1	0	0	0	10	3	4	5	5	5	22	5	3	4	4	5	5	4	30	62	83.7838
28	＜30	Male	Bachelor	Unmarried	Radiology department	5	5-10years	Doctor	None	Yes	Good	4-8hours	0	1	1	1	1	1	1	1	1	1	1	0	0	0	10	3	4	5	5	5	22	5	3	4	4	5	5	4	30	62	83.7838
28	＜30	Male	Bachelor	Unmarried	Radiology department	5	5-10years	Doctor	None	Yes	Good	4-8hours	0	1	1	1	1	1	1	1	1	1	1	0	0	0	10	3	4	5	5	5	22	5	3	4	4	5	5	4	30	62	83.7838
28	＜30	Male	Bachelor	Unmarried	Radiology department	5	5-10years	Doctor	None	Yes	Good	4-8hours	0	1	1	1	1	1	1	1	1	1	1	0	0	0	10	3	4	5	5	5	22	5	3	4	4	5	5	4	30	62	83.7838
30	30-40	Male	Bachelor	Unmarried	Radiology department	6	5-10years	Doctor	None	Yes	Good	4-8hours	0	0	1	1	1	1	1	1	0	1	1	0	0	0	8	3	4	5	5	5	22	4	3	4	4	5	5	4	29	59	79.7297
32	30-40	Male	Bachelor	Unmarried	Radiology department	6	5-10years	Doctor	None	Yes	Good	4-8hours	0	0	0	1	1	1	1	1	0	0	0	0	0	0	5	3	4	5	5	5	22	4	3	4	4	5	5	4	29	56	75.6757
29	＜30	Male	≥Master	Married	Oncology department	3	＜5	The other health personnel	None	Yes	Good	4-8hours	1	1	1	1	1	1	1	1	1	1	1	1	1	1	14	5	5	5	5	5	25	5	5	5	5	5	5	5	35	74	100
32	30-40	Male	Bachelor	Married	Nuclear medicine department	7	5-10years	Doctor	1	Yes	Good	4-8hours	1	1	1	1	1	1	0	0	1	1	1	1	1	1	12	3	5	5	5	5	23	5	2	5	4	5	5	4	30	65	87.8378
41	41-50	Male	≥Master	Married	Surgery department	10	5-10years	Doctor	1	Yes	Good	4-8hours	1	1	1	1	1	1	0	0	1	1	1	1	1	1	12	3	5	5	5	5	23	5	3	5	4	5	5	4	31	66	89.1892
59	＞50	Male	Bachelor	Married	Department of interventional surgery	40	＞20	Doctor	1	Yes	Good	4-8hours	1	1	1	1	1	1	1	1	1	1	1	1	1	1	14	5	3	4	5	5	22	5	5	5	5	5	5	5	35	71	95.9459
59	＞50	Male	Bachelor	Married	Department of interventional surgery	40	＞20	Technicians	1	Yes	Good	4-8hours	1	1	1	1	1	1	1	1	1	1	1	1	1	1	14	5	3	4	5	5	22	5	5	5	5	5	5	5	35	71	95.9459
59	＞50	Male	Bachelor	Married	Department of interventional surgery	35	＞20	Nurse	1	Yes	Good	4-8hours	1	1	1	1	1	1	0	0	1	1	1	1	1	1	12	5	3	4	5	5	22	3	3	5	5	5	5	5	31	65	87.8378
59	＞50	Male	Bachelor	Married	Department of interventional surgery	39	＞20	Nurse	1	Yes	Good	4-8hours	1	1	1	1	1	1	1	1	1	1	1	1	1	1	14	5	3	4	5	5	22	5	5	5	5	5	5	5	35	71	95.9459
41	41-50	Male	Bachelor	Married	Radiology department	21	＞20	Technicians	≥2	Yes	Good	4-8hours	1	1	1	1	1	1	1	1	1	1	1	1	1	1	14	4	3	5	5	5	22	5	5	5	5	5	5	5	35	71	95.9459
41	41-50	Male	Bachelor	Married	Radiology department	21	＞20	Technicians	≥2	Yes	Good	4-8hours	1	1	1	1	1	1	1	1	1	1	1	1	1	1	14	4	3	5	5	5	22	5	5	5	5	5	5	5	35	71	95.9459
41	41-50	Male	≥Master	Married	Radiology department	21	＞20	Technicians	≥2	Yes	Good	4-8hours	1	1	1	1	1	1	1	1	1	1	1	1	1	1	14	4	3	5	5	5	22	5	5	5	5	5	5	5	35	71	95.9459
41	41-50	Male	≥Master	Married	Radiology department	21	＞20	Technicians	≥2	Yes	Good	4-8hours	1	1	1	1	1	1	1	1	1	1	1	1	1	1	14	4	3	5	5	5	22	5	5	5	5	5	5	5	35	71	95.9459
23	＜30	Male	Bachelor	Unmarried	Radiology department	1	＜5	Technicians	None	Yes	Good	4-8hours	1	1	1	1	1	1	1	1	1	1	1	1	1	1	14	4	3	5	5	4	21	4	2	5	5	5	4	5	30	65	87.8378
23	＜30	Male	Bachelor	Unmarried	Radiology department	1	＜5	Technicians	None	Yes	Good	4-8hours	1	1	1	1	1	1	1	1	0	1	1	1	1	1	13	4	3	5	5	4	21	4	4	5	5	5	4	5	32	66	89.1892
23	＜30	Male	≥Master	Unmarried	Radiology department	1	＜5	Technicians	None	Yes	Good	4-8hours	1	1	1	1	1	1	1	1	1	1	1	1	1	1	14	4	3	5	5	4	21	5	2	5	5	5	4	5	31	66	89.1892
23	＜30	Male	≥Master	Unmarried	Radiology department	1	＜5	Technicians	None	Yes	Good	4-8hours	1	1	1	1	1	1	1	1	1	1	1	1	1	1	14	4	3	5	5	4	21	5	2	5	5	5	4	5	31	66	89.1892
31	30-40	Male	Bachelor	Married	Surgery department	7	5-10years	Nurse	1	No	Average	＞8	0	0	0	0	0	0	0	0	0	0	0	0	0	0	0	5	5	5	5	5	25	2	2	5	5	5	5	5	29	54	72.973
31	30-40	Male	Bachelor	Married	Surgery department	7	5-10years	Nurse	1	No	Average	＞8	0	0	0	0	0	0	0	0	0	0	0	0	0	0	0	5	5	5	5	5	25	3	3	5	5	5	5	5	31	56	75.6757
31	30-40	Male	Bachelor	Married	Oncology department	7	5-10years	Nurse	1	No	Average	＞8	0	0	0	0	0	0	0	0	0	0	0	0	0	0	0	3	3	3	3	3	15	3	3	5	5	5	5	5	31	46	62.1622
34	30-40	Male	Bachelor	Married	Department of interventional surgery	9	5-10years	Nurse	1	Yes	Average	＞8	0	0	1	1	1	1	0	0	0	1	1	0	1	0	7	3	4	4	5	5	21	3	3	5	5	4	5	5	30	58	78.3784
33	30-40	Male	Bachelor	Married	Department of interventional surgery	10	5-10years	Nurse	1	Yes	Average	＞8	0	0	1	0	1	1	0	0	0	1	1	0	0	0	5	3	5	5	5	5	23	4	4	5	5	4	5	5	32	60	81.0811
33	30-40	Male	Bachelor	Married	Department of interventional surgery	10	5-10years	Nurse	1	Yes	Average	＞8	0	1	1	0	1	1	1	0	0	1	1	1	0	0	8	3	4	5	4	5	21	4	4	5	5	3	5	5	31	60	81.0811
33	30-40	Male	Bachelor	Married	Department of interventional surgery	10	5-10years	Nurse	1	Yes	Average	＞8	0	1	1	0	1	1	1	0	0	1	1	0	0	0	7	3	5	4	5	5	22	4	4	5	5	4	5	5	32	61	82.4324
33	30-40	Male	Bachelor	Married	Department of interventional surgery	10	5-10years	Nurse	1	Yes	Average	＞8	0	0	1	0	1	1	0	0	0	1	1	0	0	0	5	3	4	4	5	5	21	4	4	5	5	3	5	5	31	57	77.027
36	30-40	Male	Bachelor	Married	Department of interventional surgery	12	11-20years	Nurse	1	Yes	Average	＞8	0	0	1	1	1	1	0	0	0	1	1	0	0	0	6	3	5	4	5	5	22	2	2	5	5	4	5	5	28	56	75.6757
35	30-40	Male	Bachelor	Married	Department of interventional surgery	13	11-20years	Nurse	1	Yes	Average	＞8	0	0	1	1	1	1	1	0	0	1	1	0	0	0	7	3	5	5	5	5	23	3	3	5	5	4	5	5	30	60	81.0811
41	41-50	Male	Bachelor	Married	Department of interventional surgery	15	11-20years	Nurse	1	Yes	Average	＞8	0	0	1	0	1	1	1	0	0	1	1	0	0	0	6	3	5	4	5	5	22	4	4	5	5	3	5	5	31	59	79.7297
33	30-40	Male	≥Master	Married	Oncology department	3	＜5	The other health personnel	None	No	Good	＞8	1	1	1	1	1	1	1	1	1	1	1	1	1	1	14	4	5	5	5	5	24	4	4	5	5	5	5	5	33	71	95.9459
34	30-40	Male	≥Master	Married	Oncology department	3	＜5	The other health personnel	None	No	Good	＞8	1	1	1	1	1	1	1	1	1	1	1	1	1	1	14	4	5	5	5	5	24	3	3	5	5	5	5	5	31	69	93.2432
45	41-50	Male	≥Master	Married	Nuclear medicine department	20	11-20years	Doctor	1	Yes	Good	＞8	1	1	1	1	1	1	1	1	1	1	1	1	1	1	14	4	4	5	5	5	23	3	3	5	5	5	5	5	31	68	91.8919
45	41-50	Male	≥Master	Married	Nuclear medicine department	21	＞20	Doctor	1	Yes	Good	＞8	1	1	1	1	1	1	1	1	1	1	1	1	1	1	14	4	4	5	5	5	23	4	4	5	5	5	5	5	33	70	94.5946
46	41-50	Male	Bachelor	Married	Surgery department	20	11-20years	Nurse	1	Yes	Good	＞8	0	0	0	0	0	0	0	0	0	0	0	0	0	0	0	3	4	5	5	5	22	1	1	1	2	3	1	2	11	33	44.5946
46	41-50	Male	Bachelor	Married	Oncology department	20	11-20years	Nurse	1	Yes	Good	＞8	0	0	0	0	0	0	0	0	0	0	0	0	0	0	0	3	4	4	5	5	21	1	1	1	2	3	1	2	11	32	43.2432
